# Supplementary material for: Magnetic Induced Terahertz Modulation Characteristics based on Ferromagnetic Nematic Liquid Crystals
Source: Preprints.org preprint supplement (doi:10.20944/preprints202209.0372.v1), 2022-09-23
Supplement: Supplementary file 1 [file supplementary]

## Supplemental information

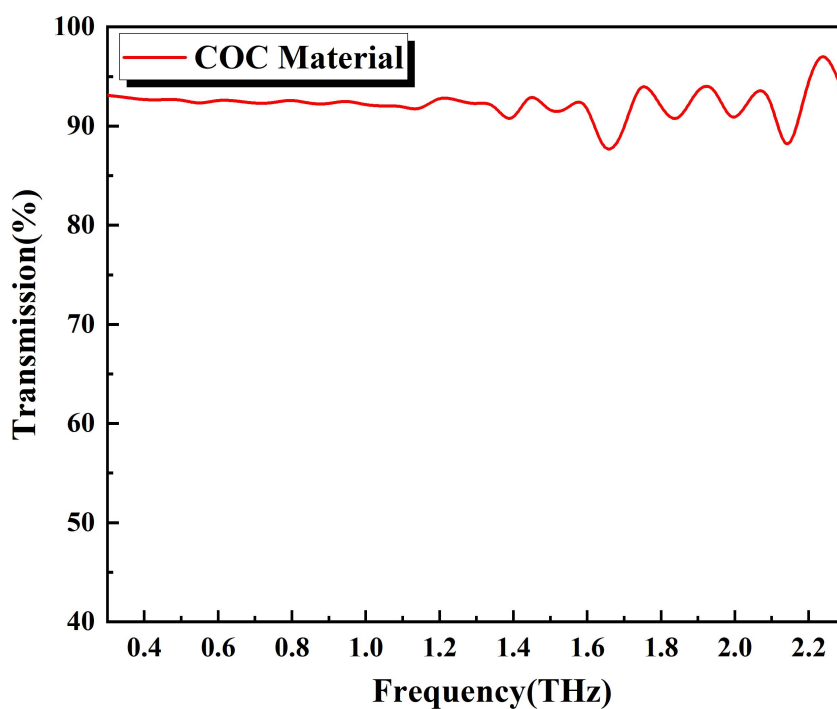

Figure S1. THz transmission spectrum of 2 mm thick COC material

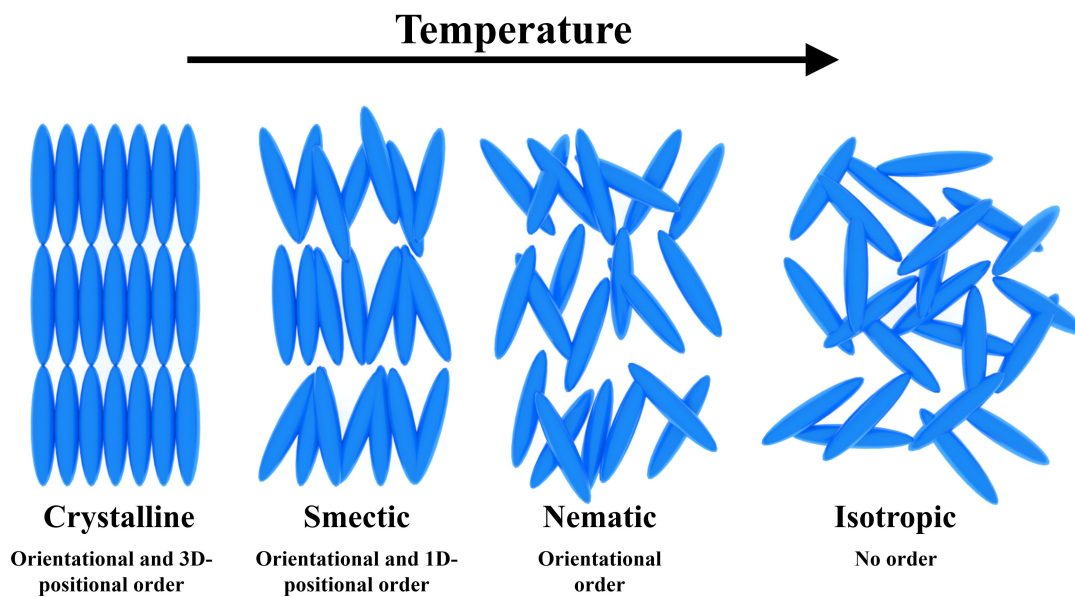

Figure S2. Schematic diagram of phase sequence and structure of thermotropic molecules. When heated, the 3D structure partially crystallizes in an ordered manner and forms a low dimensional smectic phase, and then evolves into a nematic phase with pure orientation and order. Finally, at higher temperatures, the formation of normal isotropic liquids is observed.

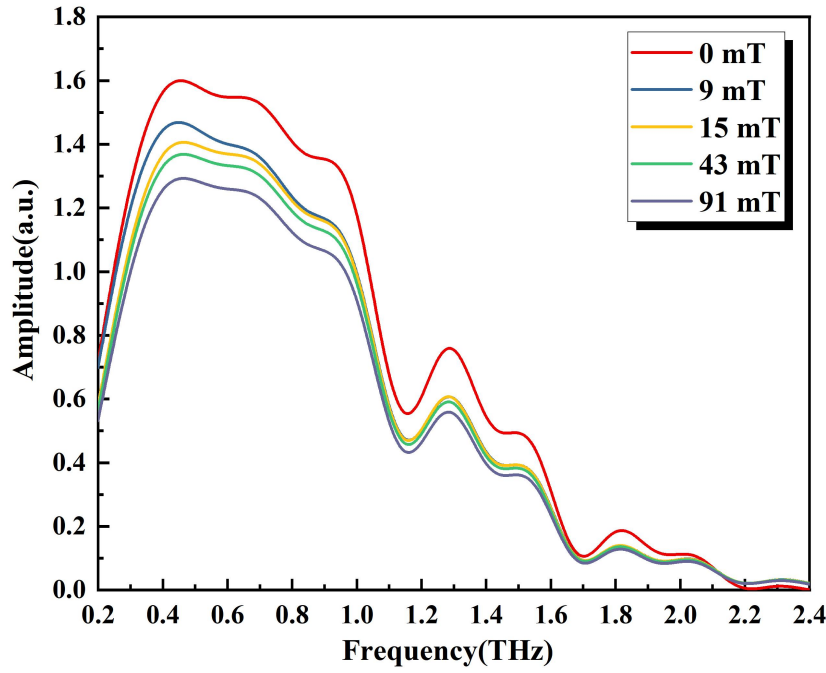

Figure S3. THz frequency domain spectrum of a magnetic fluid at different magnetic field strength.

### Calculation methods

In this experiment, the thickness of the sample detection area of the THz microfluidic chip had hundred-micron level. To eliminate the influence of Fabry–Perot oscillation on the experiment, we used the flat-plate medium model based on the Fresnel formula proposed by Dorney [30] to process the experimental data. In the model, the calculation formulas of sample refractive index  $n(\omega)$ , extinction coefficient  $k(\omega)$ , and absorption coefficient  $\alpha(\omega)$  are as follows:

$$n(\omega) = \frac{\varphi(\omega)}{\omega d} + 1,$$

$$\alpha(\omega) = \frac{2k(\omega)\omega}{c} = \frac{2}{d} \ln \frac{4n(\omega)}{A(\omega)[n(\omega) + 1]^2}$$

where  $c$  denotes the speed of light,  $d$  denotes the sample thickness,  $\omega$  denotes the signal angular frequency,  $A(\omega)$  denotes the ratio of the Fourier transform frequency-domain spectral amplitude of the sample signal and the reference signal, and  $\varphi(\omega)$  denotes the phase difference between the sample signal and the reference signal. The relationship between the refractive index, extinction coefficient, and dielectric constant  $\varepsilon$ , conductivity  $\sigma$  is as follows:

$$\varepsilon = \varepsilon_r + i\varepsilon_i, \quad \varepsilon_r = n^2 - k^2, \quad \varepsilon_i = 2nk,$$

$$\sigma = \sigma_r + i\sigma_i, \quad \sigma_r = \varepsilon_0\omega\varepsilon_i, \quad \sigma_i = \varepsilon_0\omega(1 - \varepsilon_r)$$

To evaluate the efficiency of the modulation process, we define the MD as follows:

$$MD = \frac{E_0(\omega)^2 - E_t(\omega)^2}{E_0(\omega)^2} \times 100\%$$

where  $E_t(\omega)$  and  $E_0(\omega)$  denote the amplitude intensities of the modulated and unmodulated fields, respectively.
